# Supplementary material for: Shigella induces epigenetic reprogramming of zebrafish neutrophils
Source: PubMed Central journal article supplement (PMC10482349; doi:10.1126/sciadv.adf9706), 2023-09-06
Supplement: sciadv.adf9706_sm.pdf [file sciadv.adf9706_sm.pdf]

Supplementary Materials for  
***Shigella* induces epigenetic reprogramming of zebrafish neutrophils**

Margarida C. Gomes *et al.*

Corresponding author: Margarida C. Gomes, margarida.castro-gomes@lshtm.ac.uk;  
Serge Mostowy, serge.mostowy@lshtm.ac.uk

*Sci. Adv.* **9**, eadf9706 (2023)  
DOI: 10.1126/sciadv.adf9706

**The PDF file includes:**

Table S1  
Figs. S1 to S6  
Legends for data files S1 to S3

**Other Supplementary Material for this manuscript includes the following:**

Data files S1 to S3

## SUPPLEMENTAL TABLES

**Table S1. Bacterial strains, qPCR primers and primers for *ospF* mutation in *S. flexneri* used in this study**

| <b>Bacterial strains</b>                |                    |                              |                   |                  |
|-----------------------------------------|--------------------|------------------------------|-------------------|------------------|
| <b>Species</b>                          | <b>Genotype</b>    | <b>Reporter</b>              | <b>Resistance</b> | <b>Reference</b> |
| <i>Shigella flexneri</i> M90T           | WT                 | GFP                          | Carbenicillin     | (96)             |
| <i>Shigella flexneri</i> M90T           | WT                 | mCherry                      | Carbenicillin     | (45)             |
| <i>Shigella flexneri</i> M90T           | WT                 | Ruby                         | Carbenicillin     | (97)             |
| <i>Shigella flexneri</i> M90T           | $\Delta mx i D$    | GFP                          | Carbenicillin     | This study       |
| <i>Shigella flexneri</i> M90T           | $\Delta r f a C$   | GFP                          | Carbenicillin     | (56)             |
| <i>Shigella flexneri</i> M90T           | $\Delta m x i E$   | Ruby                         | Carbenicillin     | (97)             |
| <i>Shigella flexneri</i> M90T           | $\Delta o s p F$   |                              | Kanamycin         | This study       |
| <i>Pseudomonas aeruginosa</i> PA14      | WT                 | GFP (chromosomal)            | Gentamycin        | (98)             |
| <i>Staphylococcus aureus</i> RN6390     | WT                 | GFP (chromosomal)            |                   | (99)             |
| <i>Mycobacterium bovis</i> BCG (Russia) | WT                 | GFP                          | Kanamycin         | (100)            |
| <b>qPCR primers</b>                     |                    |                              |                   |                  |
| <b>Name</b>                             | <b>GeneID</b>      | <b>Sequence (5'-3')</b>      | <b>Reference</b>  |                  |
| <i>eef1a1aFW</i>                        | ENSDARG00000039502 | AAGCTTGAAGACAACCCCA<br>AGAGC | (101)             |                  |
| <i>eef1a1aRV</i>                        | ENSDARG00000039502 | ACTCCTTTAATCACTCCCAC<br>CGCA | (101)             |                  |
| <i>cxcl8aFW</i>                         | ENSDARG00000104795 | TGTGTTATTGTTTTCTGGC<br>ATTC  | (102)             |                  |
| <i>cxcl8aRV</i>                         | ENSDARG00000104795 | GCGACAGCGTGGATCTACA<br>G     | (102)             |                  |
| <i>cxcl18bFW</i>                        | ENSDARG00000075045 | TCTTCTGCTGCTGCTTGCG<br>GT    | (103)             |                  |
| <i>cxcl18bRV</i>                        | ENSDARG00000075045 | GGTGTCCCTGCGAGCACGA<br>T     | (103)             |                  |
| <i>il1bFW</i>                           | ENSDARG00000098700 | GAACAGAATGAAGCACATC<br>AAACC | (103)             |                  |
| <i>il1bRV</i>                           | ENSDARG00000098700 | ACGGCACTGAATCCACCAC          | (103)             |                  |
| <i>il6FW</i>                            | ENSDARG00000102318 | TCAACTTCTCCAGCGTGATG         | (104)             |                  |
| <i>il6RV</i>                            | ENSDARG00000102318 | TCTTCCCTCTTTCTCCT<br>G       | (104)             |                  |
| <i>il10FW</i>                           | ENSDARG00000078147 | CATAACATAAACAGTCCCTA<br>TG   | (105)             |                  |
| <i>il10RV</i>                           | ENSDARG00000078147 | GTACCTCTTG<br>CATTCACCA      | (105)             |                  |
| <i>tnfaFW</i>                           | ENSDARG00000009511 | AGACCTTAGACTGGAGAGA<br>TGAC  | (102)             |                  |
| <i>tnfaRV</i>                           | ENSDARG00000009511 | CAAAGACACCTGGCTGTAG<br>AC    | (102)             |                  |

|                                                               |                                                                            |                                 |                                         |
|---------------------------------------------------------------|----------------------------------------------------------------------------|---------------------------------|-----------------------------------------|
| <i>gscfaFW</i>                                                | ENSDARG00000102211                                                         | GCTTTTTGATTGGTGGTGGCT<br>ATAATG | (29)                                    |
| <i>gcsfaRV</i>                                                | ENSDARG00000102211                                                         | CAACGATCCCCACTAATGT<br>GAA      | (29)                                    |
| <i>mmp9FW</i>                                                 | ENSDARG00000042816                                                         | CATTAAAGATGCCCTGATGT<br>ATCCC   | (102)                                   |
| <i>mmp9RV</i>                                                 | ENSDARG00000042816                                                         | AGTGGTGGTCCGTGGTTGA<br>G        | (102)                                   |
| <b>Primers for <i>ospF</i> mutation in <i>S. flexneri</i></b> |                                                                            |                                 |                                         |
| <b>Name</b>                                                   | <b>Sequence (5'-3')</b>                                                    |                                 | <b>Notes</b>                            |
| OspFMutFw                                                     | GAAGCAGCTCCAGCCTACACAACAGGGCTTTTTTATG<br>GGCATAGAAAACGTCCTCTATAAAATAGATATA |                                 | Deletion <i>ospF</i>                    |
| OspFMutRv                                                     | CTAAGGAGGATATTCATATGTATCGTTTGATGATAGA<br>GTAGAGAAGATGCCAGCTACACCACCTGTAGC  |                                 | Deletion <i>ospF</i>                    |
| OspF_Conf5                                                    | AAAAGATGAAGGCCTGATGGGAGCATTAAAC                                            |                                 | Confirmation of<br><i>ospF</i> deletion |
| OspF_Conf3                                                    | TGGTGGATAAAACCCGCCAGAATGAACA                                               |                                 | Confirmation of<br><i>ospF</i> deletion |

## SUPPLEMENTAL FIGURES

Figure S1

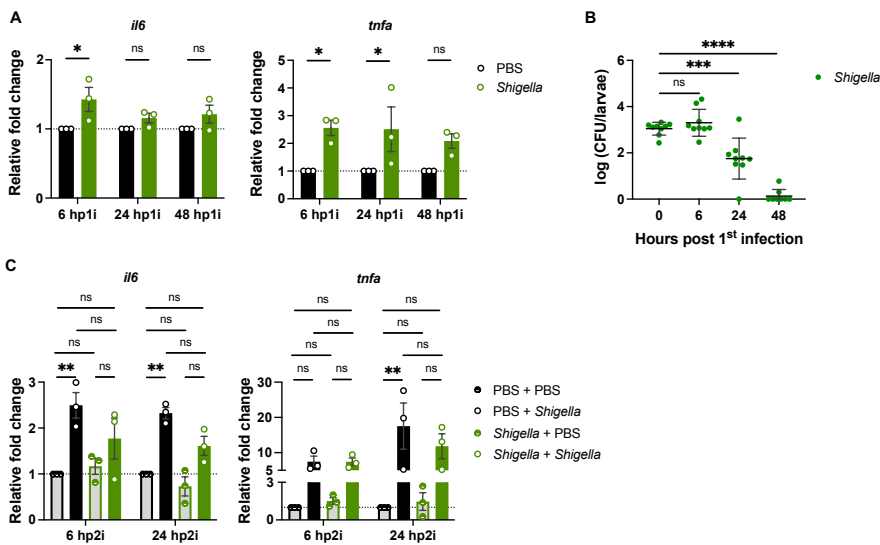

**Figure S1, related to Figure 1 – Expression of *il6* and *tnfa* during training and reinfection.**

**(A)** Fold change in the expression of *il6* and *tnfa* in larvae injected with non-lethal dose of *S. flexneri* M90T ( $1.3 \times 10^3 \pm 5.5 \times 10^2$  CFUs) as compared to PBS control (naïve-black full bars). Data pooled from 3 experiments with  $n > 5$  larvae per time point per condition per experiment (mean  $\pm$  SD, \* $p < 0.05$ , 2-way ANOVA with Sidak's multiple comparisons test).

**(B)** Log<sub>10</sub>-transformed CFU counts *Shigella*-trained larvae injected with a non-lethal dose of *S. flexneri* M90T ( $1.3 \times 10^3 \pm 5.5 \times 10^2$  CFUs). Data pooled from 3 independent experiments using  $n = 3$  larvae per condition per experiment (mean  $\pm$  SD, \*\*\* $p < 0.001$ , \*\*\*\* $p < 0.0001$ , 1-way ANOVA with Dunnett's multiple comparisons test).

**(C)** Fold change in the expression of *il6* and *tnfa* following lethal dose injection of *S. flexneri* M90T in naïve (black full bars,  $2.5 \times 10^4 \pm 1 \times 10^4$  CFUs) and *Shigella*-trained (green full bars,  $2.7 \times 10^4 \pm 4.5 \times 10^3$  CFUs) as compared to PBS injected controls (grey bars). Data pooled from 3 experiments with  $n > 5$  larvae per time point per condition per experiment (mean  $\pm$  SD, \*\* $p < 0.01$ , 2-way ANOVA with Sidak's multiple comparisons test).

Figure S2

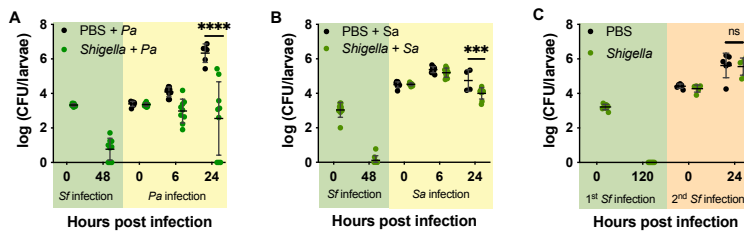

**Figure S2, related to Figure 2 – Bacterial burden during reinfection with *P. aeruginosa* and *S. aureus*, and after 5 dp1i.**

**(A)** Log<sub>10</sub>-transformed CFU counts of naïve and *Shigella*-trained (in green section:  $2.2 \times 10^3 \pm 3.8 \times 10^2$  CFUs) larvae injected with a lethal dose of *P. aeruginosa* (in orange section: PBS –  $2.6 \times 10^3 \pm 7.4 \times 10^2$  CFUs, *Shigella* –  $2.3 \times 10^3 \pm 5.5 \times 10^2$  CFUs). Data pooled from 3 independent experiments using n=3 larvae per condition per experiment (mean  $\pm$  SD, \*\*\*\*p < 0.0001, 1-way ANOVA with Tukey's multiple comparisons test).

**(B)** Log<sub>10</sub>-transformed CFU counts of naïve and *Shigella*-trained (in green section:  $1.4 \times 10^3 \pm 8.6 \times 10^2$  CFUs) larvae injected with a non-lethal dose of *S. aureus* (PBS –  $3.4 \times 10^4 \pm 1.1 \times 10^4$  CFUs, *Shigella* –  $3.4 \times 10^4 \pm 6 \times 10^3$  CFUs). Data pooled from 3 independent experiments using n=3 larvae per condition per experiment (mean  $\pm$  SD, 1-way ANOVA with Tukey's multiple comparisons test).

**(C)** Log<sub>10</sub>-transformed CFU counts of naïve and *Shigella*-trained (in green section:  $1.7 \times 10^3 \pm 5.7 \times 10^2$  CFUs) larvae injected with a lethal dose of *S. flexneri* M90T (in red section: PBS -  $2.7 \times 10^4 \pm 4.5 \times 10^3$  CFUs, *Shigella* -  $2.5 \times 10^4 \pm 1 \times 10^4$  CFUs). Data pooled from 3 independent experiments using n>2 larvae per condition per experiment (mean  $\pm$  SD, 1-way ANOVA with Tukey's multiple comparisons test).

Figure S3

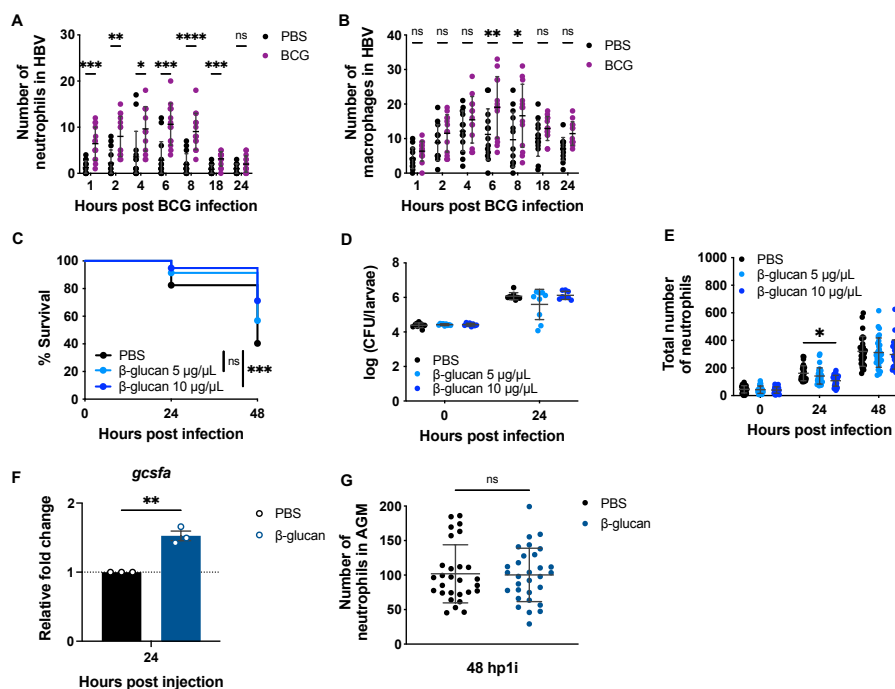

**Figure S3, related to Figure 3 – Leukocyte recruitment to BCG infected HBV, testing different  $\beta$ -glucan concentrations, and granulopoiesis in  $\beta$ -glucan training.**

**(A)** Quantification of recruited neutrophils (Tg(*lyz::dsRed*)) to the HBV in naïve (black full circles) and BCG-trained (purple full circles,  $4 \times 10^2 \pm 1.5 \times 10^2$  CFUs) larvae. Data pooled from 3 experiments with  $n > 4$  larvae per time point per condition per experiment (mean  $\pm$  SD, 2-way ANOVA with Sidak's multiple comparisons test).

**(B)** Quantification of recruited macrophages (Tg(*mpeg::mCherry*)) to the HBV in naïve (black full circles) and BCG-trained (purple full circles,  $4 \times 10^2 \pm 1.5 \times 10^2$  CFUs) larvae. Data pooled from 3 experiments with  $n > 4$  larvae per time point per condition per experiment (mean  $\pm$  SD, 2-way ANOVA with Sidak's multiple comparisons test).

**(C)** Survival curves from naïve (black full circles) and  $\beta$ -glucan-trained (light blue full circles: 5 ng, dark blue full circles: 10 ng) larvae infected with a lethal dose of *S. flexneri* M90T. Data pooled from 3 independent experiments using  $n > 18$  larvae per condition per experiment (\*\* $p < 0.01$ , Log-rank (Mantel-Cox) test).

**(D)** Log<sub>10</sub>-transformed CFU counts of naïve and  $\beta$ -glucan-trained larvae injected with a lethal dose of *S. flexneri* M90T (PBS –  $2.5 \times 10^4 \pm 7.3 \times 10^3$  CFUs,  $\beta$ -glucan 5 ng –  $2.7 \times 10^4 \pm 3.2 \times 10^3$  CFUs,  $\beta$ -glucan 10 ng –  $2.7 \times 10^4 \pm 5.1 \times 10^3$  CFUs). Data pooled from 3 independent experiments using  $n = 3$  larvae per condition per experiment (mean  $\pm$  SD, 2-way ANOVA with Sidak's multiple comparisons test).

**(E)** Quantification of neutrophils (Tg(*lyz::dsRed*)) at 0, 24 and 48 hp1i injected with PBS (naïve- black full circles) and a non-lethal dose of  $\beta$ -glucan (light blue full circles: 5 ng, dark blue full circles: 10 ng). Data pooled from 3 experiments with  $n > 8$  larvae per time point per condition per experiment (mean  $\pm$  SD, \* $p < 0.05$ , 2-way ANOVA with Sidak's multiple comparisons test).

**(F)** Fold change in the expression of *gcsfa* following non-lethal dose injection of  $\beta$ -glucan (blue bars, 20 ng) as compared to PBS injected controls (black bars). Data pooled from 3

experiments with  $n=10$  larvae per time point per condition per experiment (mean  $\pm$  SD,  $**p < 0.01$ , unpaired Student's  $t$ -test).

**(G)** Quantification of neutrophils (Tg(*lyz::dsRed*)) in the AGM at 48 hp1i injected with PBS (naïve- black full circles) and a non-lethal dose of  $\beta$ -glucan (blue full circles, 20 ng). Data pooled from 3 experiments with  $n>8$  larvae per time point per condition per experiment (mean  $\pm$  SD, unpaired Student's  $t$ -test).

Figure S4

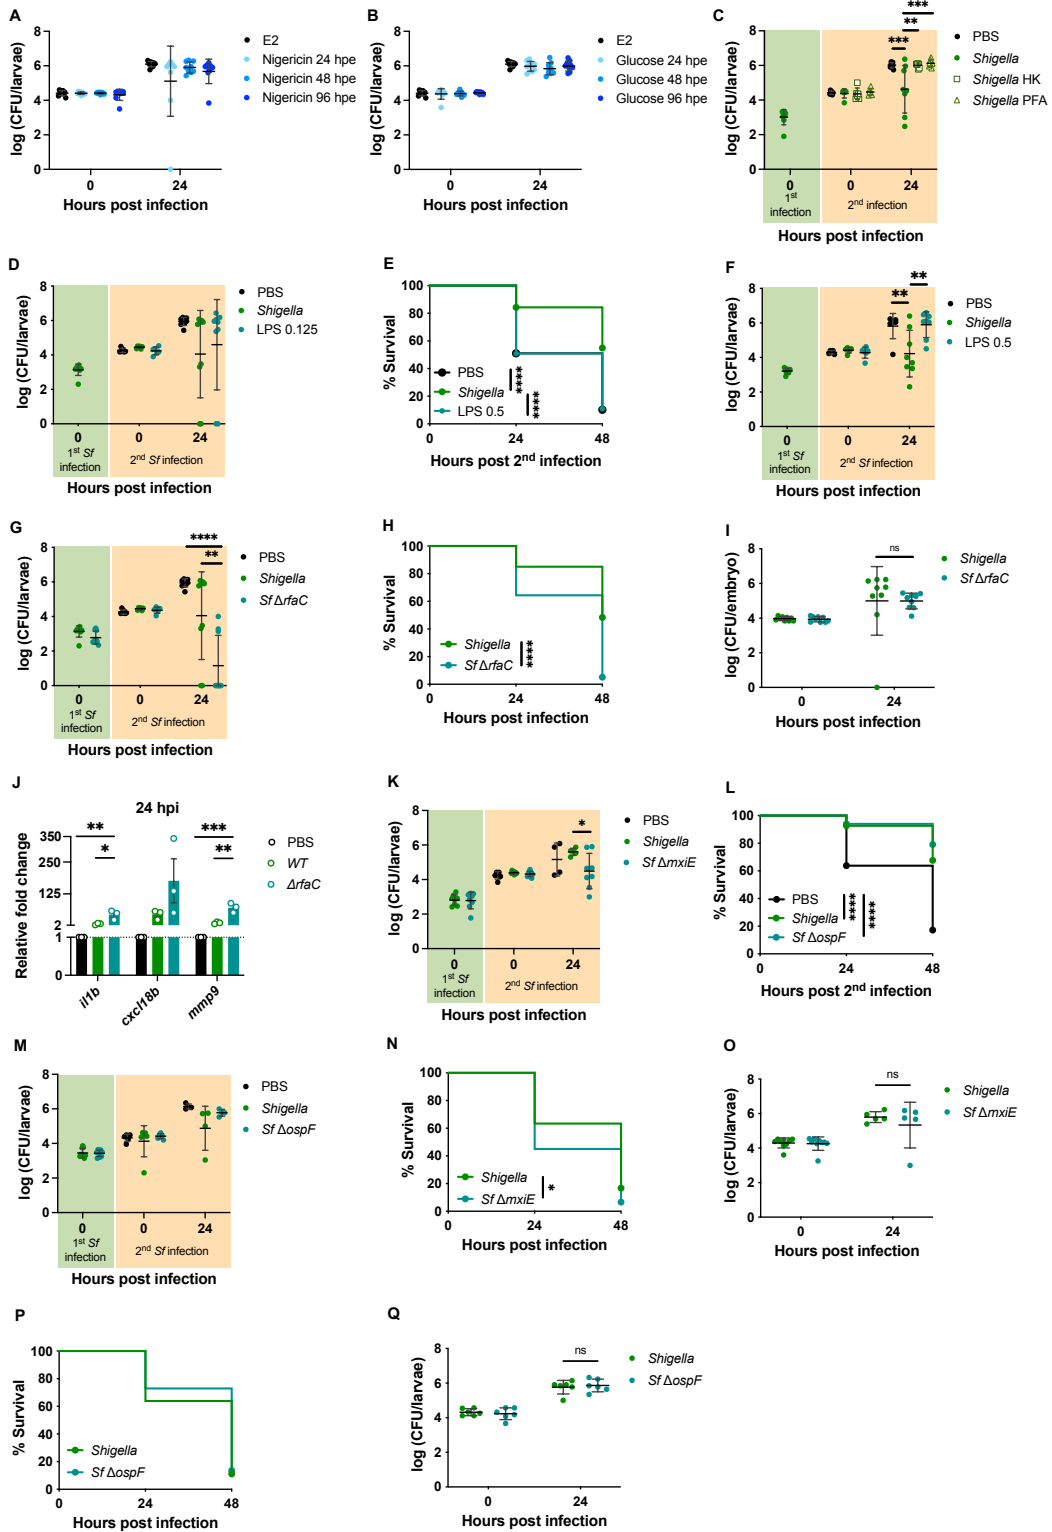

Figure S4, related to Figure 4 – Bacterial burden during reinfection upon stimulation of inflammatory pathways and virulence assays with *Shigella* mutants.



**(A)** Log<sub>10</sub>-transformed CFU counts from E2 (embryo media control, black full circles) and nigericin (blue full circles, 0.1 μM) treated larvae infected with a lethal dose of *S. flexneri* M90T (PBS –  $2.7 \times 10^4 \pm 8.5 \times 10^3$  CFUs, nigericin –  $2.6 \times 10^4 \pm 4.1 \times 10^3$  CFUs). Data pooled from 3 independent experiments using n=3 larvae per condition per experiment (mean ± SD, 2-way ANOVA with Sidak's multiple comparisons test).

**(B)** Log<sub>10</sub>-transformed CFU counts from E2 (embryo media control, black full circles) and glucose (blue full circles, 1%) treated larvae infected with a lethal dose of *S. flexneri* M90T (PBS –  $2.7 \times 10^4 \pm 8.5 \times 10^3$  CFUs, glucose –  $2.7 \times 10^4 \pm 1 \times 10^4$  CFUs). Data pooled from 3 independent experiments using n=3 larvae per condition per experiment (mean ± SD, 2-way ANOVA with Sidak's multiple comparisons test).

**(C)** Log<sub>10</sub>-transformed CFU counts from naïve (black full circles), live *Shigella*-trained (green full circles,  $1.3 \times 10^3 \pm 6.6 \times 10^2$  CFUs), heat-killed (HK) *Shigella*-trained (dark green/white squares) and PFA-killed *Shigella*-trained (dark green/white triangles) larvae infected with a lethal dose of *S. flexneri* M90T (PBS –  $2.7 \times 10^4 \pm 6.1 \times 10^3$  CFUs, *Shigella* –  $2.7 \times 10^4 \pm 1 \times 10^4$  CFUs, *Shigella* HK –  $3.2 \times 10^4 \pm 3.3 \times 10^4$  CFUs, *Shigella* PFA –  $3.2 \times 10^4 \pm 1.7 \times 10^4$  CFUs). Data pooled from 3 independent experiments using n=3 larvae per condition per experiment (mean ± SD, \*\*p < 0.01, \*\*\*\*p < 0.0001, 2-way ANOVA with Sidak's multiple comparisons test).

**(D)** Log<sub>10</sub>-transformed CFU counts from naïve (black full circles), *Shigella*-trained (green full circles,  $1.6 \times 10^3 \pm 6.5 \times 10^2$  CFUs) and LPS-primed (moss green full circles, 0.125 ng) larvae infected with a lethal dose of *S. flexneri* M90T (PBS –  $1.9 \times 10^4 \pm 6.3 \times 10^3$  CFUs, *Shigella* –  $2.8 \times 10^4 \pm 4.7 \times 10^3$  CFUs, LPS –  $1.9 \times 10^4 \pm 9.1 \times 10^3$  CFUs). Data pooled from 3 independent experiments using n=3 larvae per condition per experiment (mean ± SD, 2-way ANOVA with Sidak's multiple comparisons test).

**(E)** Survival curves from naïve (black full circles), *Shigella*-trained (green full circles,  $1.7 \times 10^3 \pm 5.5 \times 10^2$  CFUs) and LPS-primed (moss green full circles, 0.5 ng) larvae infected with a lethal dose of *S. flexneri* M90T (PBS –  $2 \times 10^4 \pm 4.6 \times 10^3$  CFUs, *Shigella* –  $2.7 \times 10^4 \pm 8.2 \times 10^3$  CFUs, LPS –  $2.3 \times 10^4 \pm 1.2 \times 10^4$  CFUs). Data pooled from 3 independent experiments using n>8 larvae per condition per experiment. (\*\*\*\*p < 0.0001, Log-rank (Mantel-Cox) test).

**(F)** Log<sub>10</sub>-transformed CFU counts from naïve (black full circles), *Shigella*-trained (green full circles,  $1.7 \times 10^3 \pm 5.5 \times 10^2$  CFUs) and LPS-primed (moss green full circles, 0.5 ng) larvae infected with a lethal dose of *S. flexneri* M90T (PBS –  $2 \times 10^4 \pm 4.6 \times 10^3$  CFUs, *Shigella* –  $2.7 \times 10^4 \pm 8.2 \times 10^3$  CFUs, LPS –  $2.3 \times 10^4 \pm 1.2 \times 10^4$  CFUs). Data pooled from 3 independent experiments using n=3 larvae per condition per experiment (mean ± SD, \*\*p < 0.01, 2-way ANOVA with Sidak's multiple comparisons test).

**(G)** Log<sub>10</sub>-transformed CFU counts from naïve (black full circles), *Shigella*-trained (green full circles,  $1.6 \times 10^3 \pm 6.5 \times 10^2$  CFUs) and *Shigella* Δ*rfaC*-trained (moss green full circles,  $8.5 \times 10^2 \pm 7.5 \times 10^2$  CFUs) larvae infected with a lethal dose of *S. flexneri* M90T (PBS –  $1.9 \times 10^4 \pm 6.3 \times 10^3$  CFUs, *Shigella* –  $2.8 \times 10^4 \pm 4.7 \times 10^3$  CFUs, Δ*rfaC* –  $2.4 \times 10^4 \pm 8.4 \times 10^3$  CFUs). Data pooled from 3 independent experiments using n=3 larvae per condition per experiment (mean ± SD, \*\*p < 0.01, 2-way ANOVA with Sidak's multiple comparisons test).

**(H)** Survival curves from virulence assay of 3 dpf larvae infected with *Shigella* (green full circles,  $9.6 \times 10^3 \pm 2.5 \times 10^3$  CFUs) and *Shigella* Δ*rfaC* (moss green full circles,  $9.1 \times 10^3 \pm 3.2 \times 10^2$  CFUs). Data pooled from 3 independent experiments using n>8 larvae per condition per experiment. (\*\*\*\*p < 0.0001, Log-rank (Mantel-Cox) test).

**(I)** Log<sub>10</sub>-transformed CFU counts from virulence assay of 3 dpf larvae infected with *Shigella* (green full circles,  $9.6 \times 10^3 \pm 2.5 \times 10^3$  CFUs) and *Shigella* Δ*rfaC* (moss green full circles,

$9.1 \times 10^3 \pm 3.2 \times 10^2$  CFUs). Data pooled from 3 independent experiments using  $n=3$  larvae per condition per experiment (mean  $\pm$  SD, 1-way ANOVA with Tukey's multiple comparisons test).

**(J)** Fold change in the expression of *il1b*, *cxcl18b* and *mmp9* following injection of PBS (black full bars), *Shigella* (green full bars,  $9.6 \times 10^3 \pm 2.5 \times 10^3$  CFUs) and *Shigella*  $\Delta$ *rfaC* (moss green full bars,  $9.1 \times 10^3 \pm 3.2 \times 10^2$  CFUs). Data pooled from 3 experiments with  $n>5$  larvae per time point per condition per experiment (mean  $\pm$  SEM, \* $p < 0.05$ , \*\* $p < 0.01$ , \*\*\* $p < 0.001$ , 2-way ANOVA with Sidak's multiple comparisons test).

**(K)** Log<sub>10</sub>-transformed CFU counts from naïve (black full circles), *Shigella*-trained (green full circles,  $7.9 \times 10^2 \pm 5.5 \times 10^2$  CFUs) and *Shigella*  $\Delta$ *mxiE*-trained (moss green full circles,  $8.8 \times 10^2 \pm 5.8 \times 10^2$  CFUs) larvae infected with a lethal dose of *S. flexneri* M90T (PBS –  $1.9 \times 10^4 \pm 7.5 \times 10^3$  CFUs, *Shigella* –  $2.5 \times 10^4 \pm 4.6 \times 10^3$  CFUs,  $\Delta$ *mxiE* –  $2.2 \times 10^4 \pm 7.6 \times 10^3$  CFUs). Data pooled from 3 independent experiments using  $n=3$  larvae per condition per experiment (mean  $\pm$  SD, 2-way ANOVA with Sidak's multiple comparisons test).

**(L)** Survival curves from naïve (black full circles), *Shigella*-trained (green full circles,  $3.4 \times 10^3 \pm 2.2 \times 10^3$  CFUs) and *Shigella*  $\Delta$ *ospF*-trained (moss green full circles,  $2.9 \times 10^3 \pm 1.1 \times 10^3$  CFUs) larvae infected with a lethal dose of *S. flexneri* M90T (PBS –  $2.4 \times 10^4 \pm 8.5 \times 10^3$  CFUs, *Shigella* –  $2.7 \times 10^4 \pm 1.5 \times 10^3$  CFUs,  $\Delta$ *ospF* –  $2.8 \times 10^4 \pm 8.9 \times 10^3$  CFUs). Data pooled from 3 independent experiments using  $n>10$  larvae per condition per experiment. (\*\*\*\* $p < 0.0001$ , Log-rank (Mantel-Cox) test).

**(M)** Log<sub>10</sub>-transformed CFU counts from naïve (black full circles), *Shigella*-trained (green full circles,  $3.4 \times 10^3 \pm 2.2 \times 10^3$  CFUs) and *Shigella*  $\Delta$ *ospF*-trained (moss green full circles,  $2.9 \times 10^3 \pm 1.1 \times 10^3$  CFUs) larvae infected with a lethal dose of *S. flexneri* M90T (PBS –  $2.4 \times 10^4 \pm 8.5 \times 10^3$  CFUs, *Shigella* –  $2.7 \times 10^4 \pm 1.5 \times 10^3$  CFUs,  $\Delta$ *ospF* –  $2.8 \times 10^4 \pm 8.9 \times 10^3$  CFUs). Data pooled from 3 independent experiments using  $n=3$  larvae per condition per experiment (mean  $\pm$  SD, \* $p < 0.05$ , 2-way ANOVA with Sidak's multiple comparisons test).

**(N)** Survival curves from virulence assay of 3 dpf larvae infected with *Shigella* (green full circles,  $2.3 \times 10^4 \pm 9.6 \times 10^3$  CFUs) and *Shigella*  $\Delta$ *mxiE* (moss green full circles,  $2.2 \times 10^4 \pm 9.8 \times 10^3$  CFUs). Data pooled from 3 independent experiments using  $n=20$  larvae per condition per experiment. (\* $p < 0.05$ , Log-rank (Mantel-Cox) test).

**(O)** Log<sub>10</sub>-transformed CFU counts from virulence assay of 3 dpf larvae infected with *Shigella* (green full circles,  $2.3 \times 10^4 \pm 9.6 \times 10^3$  CFUs) and *Shigella*  $\Delta$ *mxiE* (moss green full circles,  $2.2 \times 10^4 \pm 9.8 \times 10^3$  CFUs). Data pooled from 3 independent experiments using  $n=3$  larvae per condition per experiment (mean  $\pm$  SD, 1-way ANOVA with Tukey's multiple comparisons test).

**(P)** Survival curves from virulence assay of 3 dpf larvae infected with *Shigella* (green full circles,  $2.3 \times 10^4 \pm 1.1 \times 10^3$  CFUs) and *Shigella*  $\Delta$ *ospF* (moss green full circles,  $2.1 \times 10^4 \pm 1.3 \times 10^4$  CFUs). Data pooled from 2 independent experiments using  $n>15$  larvae per condition per experiment. (\* $p < 0.05$ , Log-rank (Mantel-Cox) test).

**(Q)** Log<sub>10</sub>-transformed CFU counts from virulence assay of 3 dpf larvae infected with *Shigella* (green full circles,  $2.3 \times 10^4 \pm 1.1 \times 10^3$  CFUs) and *Shigella*  $\Delta$ *ospF* (moss green full circles,  $2.1 \times 10^4 \pm 1.3 \times 10^4$  CFUs). Data pooled from 2 independent experiments using  $n=3$  larvae per condition per experiment (mean  $\pm$  SD, 1-way ANOVA with Tukey's multiple comparisons test).

Figure S5

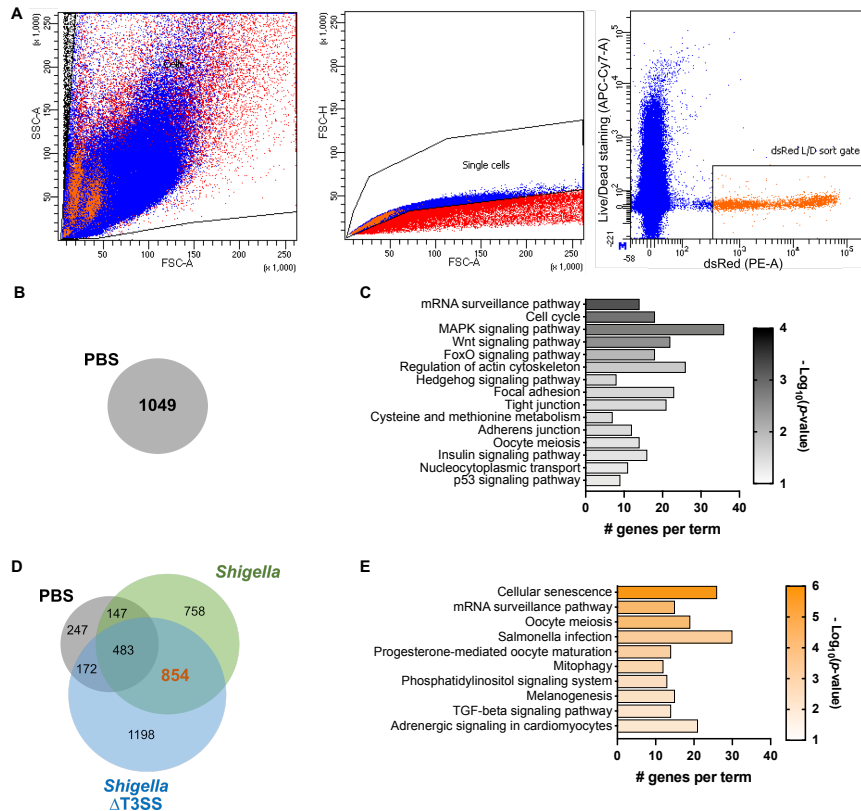

**Figure S5, related to Figure 5 – ChIP-seq analysis of PBS, *Shigella*- and *Shigella*  $\Delta$ T3SS-trained neutrophils.**

**(A)** Gating strategy for FACS sorting neutrophils from Tg(*lyz::dsRed*) larvae. Post cell identification, duplet exclusion and determination of live and dead cells (LIVE/DEAD™ Fixable Near IR Stain), neutrophils were identified by dsRed expression, followed by single cell sorting.

**(B)** Venn diagram showing number of genes marked by H3K4me3 peaks in their promoter regions (±3kb from TSS) of PBS treated larvae.

**(C)** Enriched KEGG-pathways ( $p$ -value < 0.01) associated with the 1049 genes marked by a H3K4me3 peak in their promoter regions (±3kb from TSS) in PBS treated larvae.

**(D)** Venn diagram showing number of common and unique genes marked by H3K4me3 peaks in their promoter regions (±3kb from TSS) of PBS, *Shigella* WT and *Shigella*  $\Delta$ T3SS trained larvae.

**(E)** Enriched KEGG-pathways ( $p$ -value < 0.01) associated with the 854 genes marked by a H3K4me3 peak in their promoter regions (±3kb from TSS) common to *Shigella* WT and *Shigella*  $\Delta$ T3SS trained larvae.

Figure S6

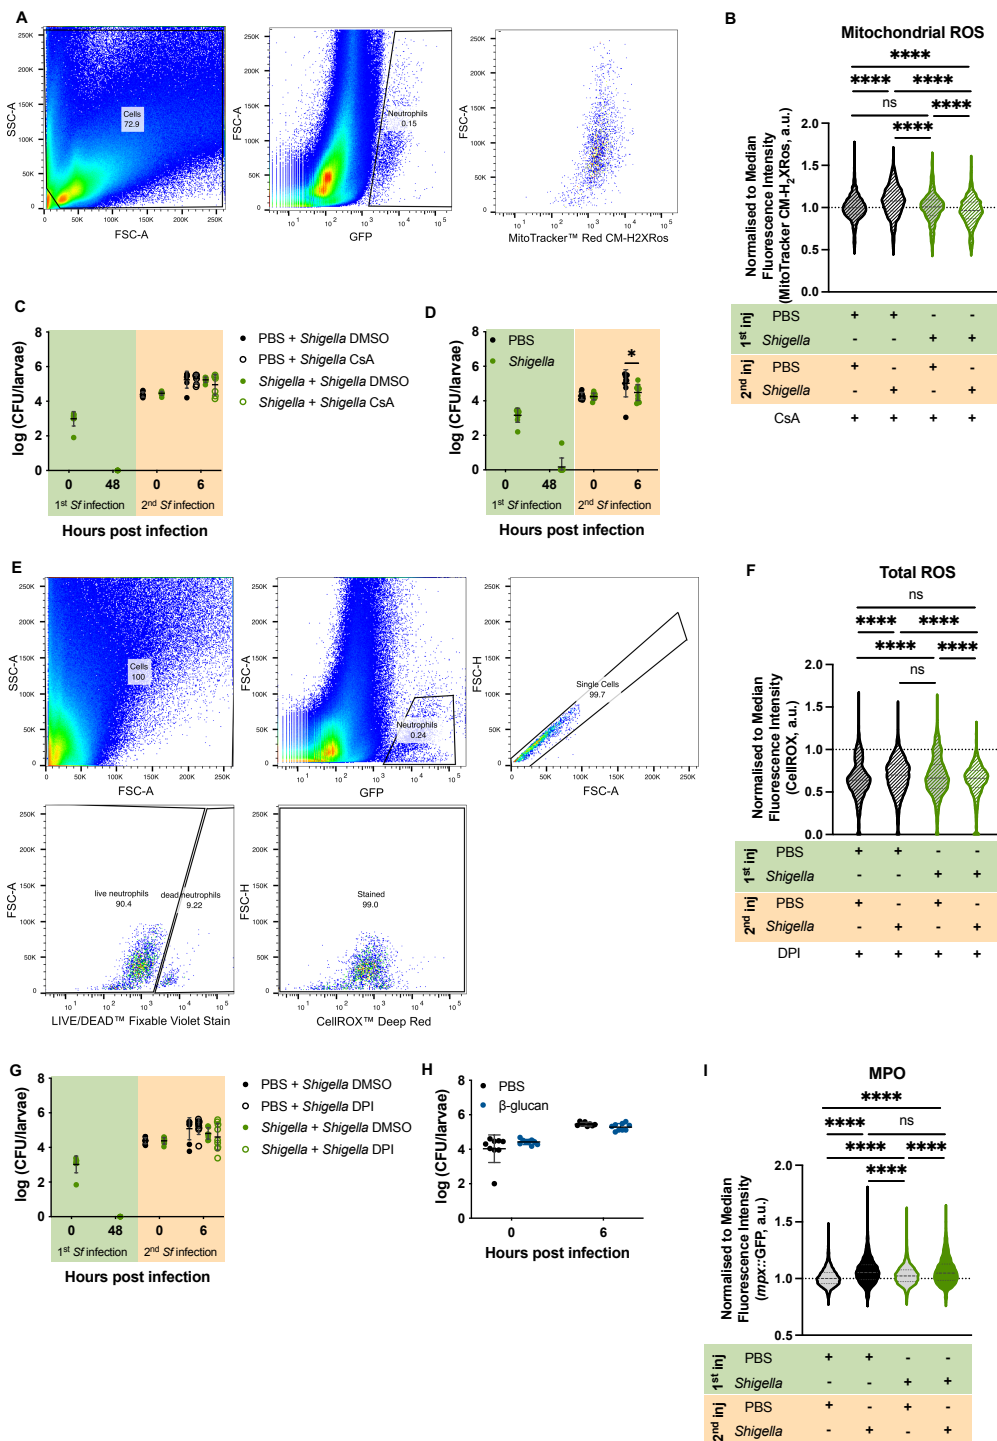

Figure S6, related to Figure 6 – Quantifying ROS in trained neutrophils.

(A) Gating strategy for flow cytometry of neutrophils from Tg(*mpx::GFP*) larvae. Neutrophils were identified by *mpx-gfp* expression. Neutrophils were analysed for their mitochondrial ROS production by fluorescence intensity detection of MitoTracker Red CM-H2XRos.

(B) Normalised fluorescence of MitoTracker Red CM-H<sub>2</sub>XRos dye neutrophils treated with CsA from naïve (black outlines) and *Shigella*-trained (green outlines,  $1.2 \times 10^3 \pm 5.3 \times 10^2$  CFUs) larvae (Tg(*mpx::GFP*)) unstimulated (grey fills) or infected with a lethal dose of *S. flexneri* M90T (PBS – black fill,  $2.6 \times 10^4 \pm 9.3 \times 10^3$  CFUs, *Shigella* – green fill,  $3 \times 10^4 \pm 6.6 \times 10^3$  CFUs)

at 6 hp2i. Data pooled from 3 experiments with  $n > 10$  larvae per condition per experiment (mean  $\pm$  SD, \*\*\*\* $p < 0.0001$ , 1-way ANOVA with Tukey's multiple comparisons test). a.u.: arbitrary units.

**(C)** Log<sub>10</sub>-transformed CFU counts of naïve and *Shigella*-trained ( $1.2 \times 10^3 \pm 5.3 \times 10^2$  CFUs) larvae injected with a lethal dose of *S. flexneri* M90T (PBS – black fill,  $2.6 \times 10^4 \pm 9.3 \times 10^3$  CFUs, *Shigella* – green fill,  $3 \times 10^4 \pm 6.6 \times 10^3$  CFUs) and treated with CsA. Data pooled from 3 independent experiments using  $n = 3$  larvae per condition per experiment (mean  $\pm$  SD, 2-way ANOVA with Sidak's multiple comparisons test).

**(D)** Log<sub>10</sub>-transformed CFU counts of naïve and *Shigella*-trained ( $1.8 \times 10^3 \pm 1 \times 10^3$  CFUs) larvae injected with a lethal dose of *S. flexneri* M90T (PBS – black fill,  $2.1 \times 10^4 \pm 1.1 \times 10^4$  CFUs, *Shigella* – green fill,  $1.9 \times 10^4 \pm 8.3 \times 10^3$  CFUs). Data pooled from 3 independent experiments using  $n = 3$  larvae per condition per experiment (mean  $\pm$  SD, 1-way ANOVA with Tukey's multiple comparisons test).

**(E)** Gating strategy for flow cytometry of neutrophils from Tg(*mpx::GFP*) larvae. Neutrophils were identified by *mpx-gfp* expression, followed by duplet exclusion and determination of live and dead cells (LIVE/DEAD™ Fixable Violet Stain). Live neutrophils were analysed for their total ROS production by fluorescence intensity detection of CellROX Deep Red.

**(F)** Normalised fluorescence of CellROX Deep Red dye neutrophils treated with DPI from naïve (black outlines) and *Shigella*-trained (green outlines,  $1.4 \times 10^3 \pm 6.7 \times 10^2$  CFUs) larvae (Tg(*mpx::GFP*)) unstimulated (grey fills) or infected with a lethal dose of *S. flexneri* M90T (PBS – black fill,  $2.6 \times 10^4 \pm 1 \times 10^4$  CFUs, *Shigella* – green fill,  $2.6 \times 10^4 \pm 1 \times 10^4$  CFUs) at 6 hp2i. Data pooled from 3 experiments with  $n > 10$  larvae per condition per experiment (mean  $\pm$  SD, \*\*\*\* $p < 0.0001$ , 1-way ANOVA with Tukey's multiple comparisons test). a.u.: arbitrary units.

**(G)** Log<sub>10</sub>-transformed CFU counts of naïve and *Shigella*-trained ( $1.4 \times 10^3 \pm 6.7 \times 10^2$  CFUs) larvae injected with a lethal dose of *S. flexneri* M90T (PBS – black fill,  $2.6 \times 10^4 \pm 1 \times 10^4$  CFUs, *Shigella* – green fill,  $2.6 \times 10^4 \pm 1 \times 10^4$  CFUs) and treated with DPI. Data pooled from 3 independent experiments using  $n = 3$  larvae per condition per experiment (mean  $\pm$  SD, 1-way ANOVA with Tukey's multiple comparisons test).

**(H)** Log<sub>10</sub>-transformed CFU counts of naïve and  $\beta$ -glucan-trained larvae injected with a lethal dose of *S. flexneri* M90T (PBS –  $2 \times 10^4 \pm 1.3 \times 10^4$  CFUs,  $\beta$ -glucan –  $2.7 \times 10^4 \pm 9.8 \times 10^3$  CFUs). Data pooled from 3 independent experiments using  $n = 3$  larvae per condition per experiment (mean  $\pm$  SD, 1-way ANOVA with Tukey's multiple comparisons test).

**(I)** Normalised fluorescence of GFP driven from *mpx* expression in neutrophils from naïve and *Shigella*-trained larvae (Tg(*mpx::GFP*)) infected with a lethal dose of *S. flexneri* M90T at 6 hp2i. Data pooled from 5 experiments with  $n > 10$  larvae per condition per experiment (mean  $\pm$  SD, \*\*\*\* $p < 0.0001$ , 1-way ANOVA with Tukey's multiple comparisons test). a.u.: arbitrary units.

**Data file S1, related to Figure 5 – Gene annotation from ChIP-seq analysis of PBS treated larvae.**

**Data file S2, related to Figure 5 – Gene annotation from ChIP-seq analysis of *Shigella*  $\Delta$ T3SS-trained neutrophils.**

**Data file S3, related to Figure 5 – Gene annotation from ChIP-seq analysis of *Shigella*-trained neutrophils.**
